## **Soluble adenylyl cyclase inhibition prevents human sperm functions essential for fertilization**

Melanie Balbach<sup>1</sup>, Lubna Ghanem<sup>1</sup>, Thomas Rossetti<sup>1</sup>, Navpreet Kaur<sup>1</sup>, Carla Ritagliati<sup>1,3</sup>, Jacob Ferreira<sup>1</sup>, Dario Krapf<sup>3</sup>, Lis C Puga Molina<sup>4</sup>, Celia Maria Santi<sup>4</sup>, Jan Niklas Hansen<sup>5</sup>, Dagmar Wachten<sup>5</sup>, Makoto Fushimi<sup>2</sup>, Peter T. Meinke<sup>1,2</sup>, Jochen Buck<sup>1</sup> & Lonny R. Levin<sup>1</sup>

<sup>1</sup>Department of Pharmacology, Weill Cornell Medicine, New York City, NY

<sup>2</sup>Tri-Institutional Therapeutics Discovery Institute, New York City, NY

<sup>3</sup>Laboratory of Cell Signal Transduction Networks, Instituto de Biología Molecular y Celular de Rosario, Rosario, Argentina

<sup>4</sup>Department of OB/GYN, Washington University School of Medicine, Saint Louis, Missouri

<sup>5</sup>Institute of Innate Immunity, Biophysical Imaging, Medical Faculty, University of Bonn, Bonn, Germany

To whom correspondence should be addressed:

Dr. Lonny R. Levin, Department of Pharmacology, Weill Cornell Medicine, 1300 York Avenue, New York City, NY, 10065; phone: +1 212 746 6752, email: [llevin@med.cornell.edu](mailto:llevin@med.cornell.edu)

1 **Abstract**

2 Soluble adenylyl cyclase (sAC: ADCY10) is essential for activating dormant sperm. Studies of  
3 freshly dissected mouse sperm identified sAC as needed for initiating capacitation and activating  
4 motility. We now use an improved sAC inhibitor, TDI-10229, for a comprehensive analysis of sAC  
5 function in human sperm. Unlike dissected mouse sperm, human sperm are collected post-  
6 ejaculation, after sAC activity has already been stimulated. Even in ejaculated human sperm, TDI-  
7 10229 interrupts stimulated motility and capacitation, and it prevents acrosome reaction in  
8 capacitated sperm. At present, there are no non-hormonal, pharmacological methods for  
9 contraception. Because sAC activity is required post-ejaculation at multiple points during the  
10 sperm's journey to fertilize the oocyte, sAC inhibitors define candidates for non-hormonal, on-  
11 demand contraceptives suitable for delivery via intravaginal devices in females.

12

## 13 Introduction

14

15 Existing family planning options are severely limited. For males, surgical vasectomy and condoms  
16 are the only available options. For females, tubal ligation provides success rates greater than  
17 99%, but the procedure is permanent. Oral contraceptives, which are also quite effective, demand  
18 female use over prolonged periods of time and, because they are hormone-based, they carry  
19 significant side effects not easily tolerated by many women. Other effective non-surgical methods,  
20 like intrauterine devices or hormonal implants, require insertion by a doctor and suffer from similar  
21 acceptability issues. Finally, user-controlled barrier methods (e.g., diaphragms or sponges) offer  
22 added protection from sexually transmitted diseases; unfortunately, these result in failure rates  
23 greater than 13%. Thus, there is a profound need for new contraceptive strategies for males and  
24 females.

25

26 Unlike hormonal strategies, which require long-term treatment, non-hormonal contraceptive  
27 strategies allow acute interruptions to fertility. Successful on-demand contraception depends on  
28 a target that is essential for fertility and amenable to pharmacological manipulation. Bicarbonate-  
29 regulated soluble adenylyl cyclase (sAC; *ADCY10*) is the predominant, if not sole, source of the  
30 ubiquitous second messenger cAMP in sperm. Upon ejaculation, morphologically mature, but  
31 functionally immature sperm come in contact with seminal fluid. Bicarbonate in semen stimulates  
32 sAC, which activates sperm motility and initiates capacitation (i.e., the process by which sperm  
33 attain fertilizing capacity in the female reproductive tract) (reviewed in <sup>1-3</sup>). In two different sAC  
34 knock out (KO) strains, males are infertile; their sperm are immotile and lack the typical hallmarks  
35 of capacitation, i.e., intracellular alkalinization, increase in protein tyrosine phosphorylation,  
36 acrosome reaction, and hyperactivated motility<sup>4,5,6</sup>. The dependence upon sAC for male fertility  
37 was also genetically validated in humans. Two infertile male patients were found to be  
38 homozygous for a frameshift mutation in the exonic region of *ADCY10*, leading to premature  
39 termination and interruption of the catalytic domains<sup>7</sup>. Similar to sperm from sAC KO mice, sperm  
40 from these patients are immotile, and the motility defect could be rescued with cell-permeable  
41 cAMP analogs. Hence, sAC is essential for sperm functions in mice and humans.

42

43 Since its initial cloning<sup>8</sup>, we identified multiple, chemically distinct small molecules that selectively  
44 inhibit sAC<sup>9</sup>. Each of these inhibitors prevented sAC-dependent functions in sperm essential for  
45 fertilization<sup>5,10</sup>. These pharmacological studies were performed on mouse sperm extracted from  
46 the epididymis, where sperm are stored in a low bicarbonate environment which maintains them

47 in a quiescent state. When incubated with these freshly dissected, dormant sperm, sAC inhibitors  
48 blocked the initiation of capacitation. We now use sAC inhibitors to study human sperm. Unlike  
49 dissected mouse sperm, human sperm are collected post-ejaculation, after sAC activity has  
50 already been stimulated by the increased concentration of bicarbonate in semen relative to  
51 epididymis. Until now, it has remained unclear whether sAC activity is continuously required for  
52 steps beyond the initiation of capacitation; i.e., is cAMP synthesis necessary as sperm transit the  
53 female reproductive tract. We now demonstrate that the sAC inhibitor TDI-10229<sup>11</sup> not only blocks  
54 motility, capacitation and *in vitro* fertilization in epididymis-isolated mouse sperm, it also inhibits  
55 motility and interrupts capacitation in post-ejaculated human sperm, and prevents acrosome  
56 reaction in capacitated mammalian sperm.

57

## 58 Results

### 59 TDI-10229 is an improved sAC-specific inhibitor

60 Previous sAC inhibitors (i.e., KH7 and LRE1) were insufficiently potent or selective to investigate  
61 their suitability as potential contraceptives. We recently developed TDI-10229<sup>11</sup> and directly  
62 compared its *in vitro* potency with LRE1 both on purified human sAC protein and in a cell-based  
63 assay. LRE1 inhibited human sAC with an IC<sub>50</sub> of 7.8 μM, as previously described<sup>10</sup>, while TDI-  
64 10229 inhibited sAC with an IC<sub>50</sub> of 0.2 μM, demonstrating that our medicinal chemistry efforts  
65 significantly improved sAC inhibitory potency (Fig. 1a). To assess membrane permeability and  
66 sAC inhibitory efficiency of TDI-10229 in a cellular system, we utilized 4-4 cells, which stably  
67 overexpress sAC in a HEK293 background. Cellular levels of cAMP reflect a balance between its  
68 synthesis by adenylyl cyclases and its catabolism by phosphodiesterases (PDEs). Hence, in the  
69 presence of the non-selective PDE inhibitor IBMX, cells accumulate cAMP solely dependent upon  
70 the activity of endogenous adenylyl cyclases. Due to the overexpression of sAC, in 4-4 cells the  
71 cAMP accumulation after PDE inhibition is almost exclusively due to sAC<sup>12,13</sup>. TDI-10229 inhibited  
72 cAMP accumulation in 4-4 cells with an IC<sub>50</sub> of 0.1 μM, which is in good agreement with its IC<sub>50</sub>  
73 on pure human sAC protein and further confirms the improved potency compared to LRE1 (IC<sub>50</sub>  
74 = 14.1 μM) (Fig. 1b).

75 Mice and humans possess a single sAC gene (ADCY10) and a second, widely-expressed family  
76 of adenylyl cyclases: G protein-regulated transmembrane adenylyl cyclases (tmACs). Although  
77 tmACs are molecularly and biochemically distinct from sAC, they are the enzymes most closely  
78 related to sAC in mammalian genomes. Thus, pharmacological inhibitors should distinguish  
79 between sAC and tmACs to minimize potential off-target liabilities. To examine TDI-10229's  
80 cross-reactivity towards tmACs, we tested whether TDI-10229 affected the *in vitro* adenylyl  
81 cyclase activities of cellular lysates each containing heterologously expressed representatives of  
82 one tmAC subclass: tmAC I, II, V, VIII, and IX. At 10 μM, 50-fold above its IC<sub>50</sub> for sAC, TDI-10229  
83 did not affect the basal nor the stimulated activities of any of the heterologously expressed tmACs  
84 (Fig. 1c). We further evaluated tmAC cross-reactivity in immortalized mouse embryonic fibroblasts  
85 (MEFs) derived from wild-type (WT) and sAC knockout (sAC KO) mice. While WT MEFs express  
86 both sAC and tmACs, the sole source of cAMP in sAC KO MEFs is the indigenous mixture of  
87 tmAC isoforms<sup>13</sup>. As expected, in the presence of the PDE inhibitor IBMX, WT cells accumulated  
88 more cAMP than sAC KO MEFs (Fig. 1d). And consistent with TDI-10229 selectively inhibiting  
89 sAC, TDI-10229 reduced the accumulation of cAMP in WT MEFs and was inert in sAC KO MEFs.  
90 In addition, TDI-10229 (at 20 μM, 200-fold above its IC<sub>50</sub> for sAC in cells) was not cytotoxic and

91 showed no appreciable activity against a panel of 310 kinases and 46 other well-known drug  
92 targets<sup>11</sup>. Thus, TDI-10229 is a potent and selective sAC inhibitor suitable for use in cellular  
93 systems.

94

### 95 **TDI-10229 blocks capacitation in both mouse and human sperm**

96 Sperm are stored in a dormant state within the cauda epididymis where the bicarbonate  
97 concentration is actively maintained at  $\leq 5$  mM. Upon ejaculation, when sperm mix with seminal  
98 fluid, as well as during transit through the female reproductive tract, sperm are exposed to higher  
99 bicarbonate levels ( $\sim 25$  mM)<sup>14,15</sup>. This bicarbonate elevation is a key initiator of capacitation;  
100 bicarbonate activates sAC which increases cAMP and protein kinase A (PKA) activity. We tested  
101 whether TDI-10229 blocks this initial signaling cascade of capacitation in mouse sperm freshly  
102 isolated from cauda epididymis. Bicarbonate-induced cAMP changes in sperm were reported to  
103 be transient<sup>16,17</sup>, so we first performed time course studies to establish when cAMP levels are  
104 maximal during capacitation. Bicarbonate-induced cAMP peaked at 10 minutes in mouse sperm,  
105 and TDI-10229 completely blocked the bicarbonate-dependent cAMP increases (Fig. 2a,b). As  
106 expected, cAMP levels in non-capacitating mouse sperm did not change over time, and TDI-  
107 10229 did not affect cAMP levels in sAC KO sperm (Fig. S1a).

108 Unlike mouse sperm which are extracted from the epididymis in a dormant state, human sperm  
109 are isolated post-ejaculation; therefore, sAC in human sperm has already been initially stimulated  
110 via exposure to elevated bicarbonate in semen. We examined the time course of sAC activation  
111 and cAMP generation in purified and washed sperm. Bicarbonate-induced cAMP peaked at 40  
112 minutes in human sperm, and TDI-10229 completely blocked the bicarbonate-dependent cAMP  
113 increases (Fig. 2b,d). Similar to mouse sperm, cAMP levels in human sperm incubated in non-  
114 capacitating conditions did not change over time.

115 Next, we measured capacitation-induced changes in PKA activity using two different assays; we  
116 directly quantified PKA enzymatic activity against an artificial substrate, and we detected  
117 endogenous PKA phosphorylated proteins. Using the direct measurement of PKA enzymatic  
118 activity, mouse and human sperm PKA activities increased during capacitation, and, in both  
119 species, the capacitation-induced increases were completely prevented by inhibiting sAC with  
120 TDI-10229 (Fig. 2e-h). Similar to the cAMP measurements, PKA activity in both mouse and  
121 human sperm incubated in non-capacitating conditions did not change over time, and TDI-10229  
122 did not affect PKA activity in sperm isolated from sAC KO mice (Fig. S1b). We further confirmed  
123 the efficacy of TDI-10229 on bicarbonate-induced PKA activity by measuring PKA substrate

124 phosphorylation. In both species, TDI-10229 dose-dependently blocked the capacitation-induced  
125 increase in PKA substrate phosphorylation (Fig. 2 i-l). Cell-permeable cAMP, in combination with  
126 the PDE inhibitor IBMX, rescued the block of capacitation-induced PKA activation by TDI-10229  
127 in both mouse and human sperm, demonstrating that the inhibition by TDI-10229 can be rescued  
128 by cAMP, the product of sAC.

129 During mammalian sperm capacitation, the cAMP-PKA signaling cascade elicits an increase in  
130 intracellular pH (pH<sub>i</sub>) (reviewed in<sup>18,19</sup>) and a prototypical pattern of tyrosine phosphorylation  
131 (pY)<sup>20</sup>. We tested whether TDI-10229 blocks these molecular hallmarks of capacitation in mouse  
132 and human sperm. Sperm alkalization controls the function of multiple proteins involved in  
133 capacitation; i.e., activation of the KSper<sup>21</sup> and/or CatSper ion channels<sup>22</sup>. During capacitation,  
134 the basal pH of 6.7 in non-capacitated mouse sperm increased approximately by 0.3 units, similar  
135 to previously reported<sup>23,24</sup> (Fig. 3a). This capacitation-induced alkalization was fully blocked by  
136 inhibiting sAC with TDI-10229. In human sperm, the intracellular pH increased from 6.8 to 7.2 due  
137 to incubation in capacitating conditions, and this increase was fully blocked using TDI-10229 (Fig.  
138 3b). Similarly, TDI-10229 blocked the capacitation-induced increase in pY in both human and  
139 mouse sperm (Fig. 3c-f). TDI-10229 inhibition of pY was concentration-dependent and rescued  
140 by cell-permeable cAMP in combination with IBMX.

141

#### 142 **sAC inhibition by TDI-10229 inhibits motility of mouse and human sperm**

143 In both mouse and human sperm, bicarbonate induced a rapid increase in flagellar beat  
144 frequency<sup>2,25</sup>. We characterized the flagellar beating pattern of mouse and human sperm using  
145 single sperm cells tethered via their heads to a glass surface. Analyses of flagellar beat  
146 parameters revealed that under basal conditions, both mouse and human sperm displayed a  
147 characteristic sigmoidal flagellar beating pattern, with a basal beat frequency of approximately 10  
148 and 20 Hz, respectively (Fig. 4,5, video 1,4). Upon stimulation with bicarbonate, consistent with  
149 other mouse studies<sup>26</sup>, mouse and human sperm increased their overall beat frequency to greater  
150 than 35 and 25 Hz, respectively. These increases were spatially distinct between mouse and  
151 human. In mouse sperm, the increase was focused on the distal end of the tail (i.e.,  $\geq 60 \mu\text{m}$  from  
152 the head), while the motility of the first half of the flagellum became more restricted (i.e.,  $\leq 20$  Hz).  
153 In contrast, in human sperm, the bicarbonate-induced increase in beat frequency was distributed  
154 over the entire flagellum. Human sperm also displayed increased curvature of their flagella.

155 In sperm from sAC KO mice<sup>4-6</sup> and sperm from patients predicted to have a sAC loss-of-function  
156 mutation<sup>23</sup>, a severe motility defect was reported. Similarly, in our hands, sAC KO sperm only  
157 showed small vibratory movements; they displayed an average beat frequency  $\leq 10$  Hz, and their  
158 mean curvature range along the flagellum was severely reduced (Fig. 4, video 2). When incubated  
159 with bicarbonate, the beat frequency of sAC KO sperm remained unchanged. Interestingly, the  
160 mean curvature range of sAC KO sperm  $\geq 60$   $\mu\text{m}$  from the head slightly increased after stimulation  
161 with bicarbonate, suggesting that some aspects of mouse sperm motility might not be regulated  
162 by sAC. Incubating sAC KO sperm with cell-permeable cAMP and IBMX at least partially rescued  
163 the defects in motility, increasing both the mean curvature range and the beat frequency (Table  
164 1).

165  
166 Incubating freshly isolated WT mouse sperm with TDI-10229 reduced the mean curvature and  
167 basal beat frequency, resembling the small vibratory movements observed in sAC KO sperm (Fig.  
168 4, video 3, Table 1). As expected for sperm in the presence of a sAC inhibitor, bicarbonate did  
169 not affect motility, and the response was largely rescued by incubation in cell-permeable cAMP  
170 and IBMX. In human sperm, TDI-10229 reduced the basal beat frequency to 15 Hz, and similar  
171 to mouse sperm, the sAC inhibitor blocked the bicarbonate-induced increase, and cell-permeable  
172 cAMP/IBMX rescued the response (Fig. 5, video 5).

173  
174 **sAC inhibition by TDI-10229 blocks acrosome reaction in capacitated mouse and human**  
175 **sperm**

176 The acrosome reaction is needed for successful fertilization: after the acrosome reaction, sperm  
177 can fuse their inner acrosomal membrane with the oocyte's plasma membrane. In our final test of  
178 capacitation, as expected, blocking sperm capacitation with TDI-10229 prevented the zona  
179 pellucidae evoked increase in the percentage of acrosome-reacted mouse sperm; this response  
180 was rescued with db-cAMP/IBMX (Fig. 6a). Because zona pellucidae from human oocytes are  
181 not available, we induced acrosome reaction with the sex hormone progesterone in human sperm.  
182 As with mouse sperm, blocking human sperm capacitation with TDI-10229 prevented the  
183 progesterone-evoked increase in the percentage of acrosome-reacted sperm (Fig. 6b), and this  
184 increase was rescued with db-cAMP/IBMX. To test whether the acrosome reaction itself is  
185 dependent upon sAC, we added TDI-10229 to capacitated sperm. After incubating mouse sperm  
186 for 90 minutes and human sperm for 3 hours in capacitating media, TDI-10229 prevented the ZP-  
187 and progesterone-induced acrosome reactions, respectively.

188



189 **TDI-10229 prevents mouse *in vitro* fertilization**

190 Since TDI-10229 successfully blocked capacitation and decreased beat frequency of mouse and  
191 human sperm, we tested whether TDI-10229 might be able to block fertilization of oocytes *in vitro*.  
192 Because CD1 mice are more efficient maters than C57Bl/6 mice, we performed *in vitro* fertilization  
193 experiments in both mouse strains. In a concentration-dependent manner, TDI-10229 blocked  
194 mouse *in vitro* fertilization in both C57Bl/6 and CD1. 5  $\mu$ M TDI-10229, which was sufficient to  
195 block molecular hallmarks of capacitation, diminished IVF by approximately 50%, but it required  
196 higher concentrations for complete blockage (Fig. 6 c,d).

197

## 198 Discussion

199 In this study, we validate TDI-10229 as a new pharmacological tool to study sAC-mediated  
200 biology. Due to its significantly improved potency combined with sAC selectivity, TDI-10229  
201 allowed for a comprehensive study of the role of sAC in mouse and human sperm *in vitro*.  
202 Previous sAC inhibitors did not reproduce the motility defect of sAC KO mouse sperm<sup>5,10</sup>, so we  
203 utilized TDI-10229 to investigate whether this discrepancy was caused by an incomplete block of  
204 sAC activity by the less potent KH7 and LRE1 or developmental defects of sAC KO sperm. TDI-  
205 10229 fully blocked the motility of mouse sperm, resulting in small vibratory movements similar to  
206 sAC KO. These observations indicate that a) previous sAC inhibitors were indeed insufficiently  
207 potent to completely switch off sAC, and b) sAC seems to regulate mouse sperm motility at  
208 multiple levels. In addition to regulating the bicarbonate-induced increase in beat frequency, sAC-  
209 generated cAMP is also required for basal motility, at least in mouse sperm. In post-ejaculated  
210 human sperm, TDI-10229 blocked the bicarbonate-induced increase in beat frequency without  
211 affecting the basal flagellar beating pattern.

212 For mouse sperm, it is well established that sAC regulates the initial step of capacitation, the  
213 bicarbonate-induced increase in cAMP. Consequently, as expected, TDI-10229 also inhibited the  
214 molecular hallmarks of capacitation downstream of this intracellular increase in cAMP; i.e., PKA  
215 activation, increase in intracellular pH, and enhanced pY. The role of sAC in human sperm  
216 physiology was less explored<sup>27,28</sup>. In this study, we demonstrate that as in mouse sperm, human  
217 sAC regulates the bicarbonate-induced increase in cAMP, PKA activation, sperm alkalization, and  
218 increase in pY. In addition, because these studies were performed in post-ejaculated human  
219 sperm, as opposed to dormant mouse sperm isolated from the cauda epididymis, these data  
220 demonstrate that sAC does not just initiate capacitation, sAC activity is continuously required  
221 during capacitation.

222 The role of sAC in the acrosome reaction was less clear. While one study in human sperm showed  
223 that the sAC inhibitor KH7 blocked acrosomal exocytosis<sup>29</sup>, another study found that sAC KO and  
224 KH7-treated mouse sperm undergo normal acrosome reaction<sup>5</sup>. Because sAC is required for  
225 capacitation, and because zona pellucidae or progesterone are thought to induce acrosome  
226 reaction only in capacitated sperm, inhibiting sAC (and therefore capacitation) should also prevent  
227 the acrosome reaction. Indeed, our data demonstrate that TDI-10229 prevents the zona pellucida-  
228 and progesterone-induced acrosome reaction in mouse and human sperm, respectively. These  
229 experiments do not address the question whether sAC activity is required during the acrosome  
230 reaction. Here, we establish that adding TDI-10229 to already capacitated mouse and human

231 sperm blocks the acrosome reaction revealing that sperm require sAC activity to undergo the  
232 acrosome reaction itself.

233 Because TDI-10229 blocks multiple processes sperm must complete to fertilize the oocyte, it  
234 comes as no surprise that TDI-10229 inhibits *in vitro* fertilization in mice. These results validate  
235 TDI-10229 and sAC inhibitors as potential non-hormonal contraceptives. Using intravaginal  
236 devices to deliver sAC inhibitors working topically, on ejaculated sperm in the female reproductive  
237 tract, will avoid systemic exposure and limit potential side effects in the female. To be effective,  
238 sperm-targeted, intravaginally-delivered contraceptives would have to interrupt activated sperm  
239 from completing the processes necessary to reach and fertilize the oocyte. Our use of TDI-10229  
240 confirmed that sAC-generated cAMP is needed at multiple levels throughout the fertilization  
241 process, and that adding sAC inhibitors to post-ejaculated human sperm inhibits motility,  
242 interrupts capacitation, and prevents the acrosome reaction. Thus, delivering sAC inhibitors via  
243 intravaginal devices will provide effective contraception because: (A) By blocking sperm motility,  
244 vaginal delivery of a sAC inhibitor will prevent sperm egress from the vagina. (B) In the presence  
245 of a sAC inhibitor, any sperm that escape the vagina will fail to capacitate. And (C) a sAC inhibitor  
246 would prevent acrosome reaction in any sperm which complete the journey and survive beyond  
247 the uterus.

248  
249 Intravaginal delivery devices offer additional advantages over other forms of contraceptives.  
250 Intravaginal rings and films have the capacity to simultaneously deliver multiple therapeutics  
251 which affords the unique opportunity to couple sAC inhibitor contraceptives with anti-infectives.  
252 Efforts aimed primarily at developing women-controlled products against sexual HIV-1 infection  
253 have fueled a rapid growth of intravaginal drug delivery programs, mostly involving antiretroviral  
254 drugs<sup>31</sup>. A number of vaginal film and intravaginal ring products are in development for HIV-1  
255 prevention, with some candidates advancing to early-stage clinical trials<sup>32-37</sup>. We envision that  
256 these antiretroviral agents could be coupled with sAC inhibitors, so that one product can prevent  
257 pregnancies and sexually transmitted diseases at the same time.

258  
259

## 260 **METHODS**

### 261 **Reagents, cell lines, and mice**

262 3-Isobutyl-1-methylxanthine (IBMX), bovine serum albumin (BSA), dibutyryl-cAMP (db-cAMP),  
263 BCECF-AM, hyaluronidase, lectin from *Arachis hypogaea* FITC-conjugated (PNA-FITC), lectin  
264 from *Pisum sativum* agglutinin FITC-conjugated (PSA/FITC), and mineral oil were purchased from  
265 Sigma-Aldrich, nigericin from Cayman Chemical, ionomycin from Tocris,  $\beta$ -mercaptoethanol from  
266 Gibco, and hormones from ProSpec. PBS buffer was purchased from Corning, EmbryoMax  
267 Modified DPBS and EmbryoMax HTF from Millipore Sigma, DMEM from Thermo Fisher Scientific  
268 and FBS from Avantor Seradigm.

269 4-4 cells, WT MEFs, and sAC KO MEFs were generated and functionally authenticated in our  
270 laboratory as previously described<sup>13</sup> and grown in DMEM + 10% FBS. All cells were maintained  
271 at 37°C in 5% CO<sub>2</sub> and were periodically checked for mycoplasma contamination.

272 Adult CD1-ICR (Stock #: 022) male and female mice were purchased from Charles River  
273 Laboratories and allowed to acclimatize before use. *Adcy10* KO<sup>5</sup> and their corresponding wildtype  
274 were in the C57BL/6J background and bred in-house. Animal experiments were approved by  
275 Weill Cornell Medicine's Institutional Animal Care and Use Committee (IACUC).

276

### 277 ***In Vitro* Cyclase Activity Assay**

278 All *in vitro* cyclase activity assays were performed via the “two-column” method measuring the  
279 conversion of [ $\alpha$ -<sup>32</sup>P] ATP into [<sup>32</sup>P] cAMP, as previously described<sup>38,39</sup>. For the *in vitro* sAC activity  
280 assays, human sAC<sub>i</sub> protein<sup>40</sup> was incubated in buffer containing 50 mM Tris 7.5, 4 mM MgCl<sub>2</sub>, 2  
281 mM CaCl<sub>2</sub>, 1mM ATP, 3 mM DTT, 40 mM NaHCO<sub>3</sub> and the indicated concentration of sAC  
282 inhibitor or DMSO as control. For the *in vitro* tmAC activity assays, mammalian tmAC isozymes  
283 tmAC I (ADCY1; bovine), tmAC II (ADCY2; rat), tmAC V (ADCY5; rat), tmAC VIII (ADCY8; rat),  
284 and tmAC IX (ADCY9; mouse) were transfected and expressed in HEK293 cells using the CMV  
285 promoter. Whole-cell lysates were incubated in buffer containing 50 mM Tris 7.5, 5 mM MgCl<sub>2</sub>,  
286 1mM ATP, 1 mM cAMP, 20 mM Creatine Phosphate, 100 U/ml Creatine Phosphokinase, 1 mM  
287 DTT, and 15 ng/ $\mu$ l DNase. When indicated, 100  $\mu$ M GTP $\gamma$ S, 50  $\mu$ M Forskolin, and/or 10 $\mu$ M TDI-  
288 10229 were included in the buffer. To determine tmAC-specific activities, the activities of empty  
289 vector-transfected lysates were subtracted. The activity in vector-transfected HEK293 lysates was  
290 0.6  $\pm$  0.03 nmol cAMP/min in the presence of 100  $\mu$ M GTP $\gamma$ S, 0.6  $\pm$  0.20 nmol cAMP/min in the  
291 presence of 100  $\mu$ M GTP $\gamma$ S + 10  $\mu$ M TDI-10229, 0.5  $\pm$  0.02 nmol cAMP/min in the presence of  
292 vehicle, and 0.6  $\pm$  0.14 nmol cAMP/min in the presence of 10  $\mu$ M TDI-10229.

293 **Cellular cAMP accumulation assay**

294  
295 sAC<sub>T</sub>-overexpressing 4-4 cells were seeded at a concentration of  $5 \times 10^6$  cells/ml in 24-well plates  
296 the day before the assay in DMEM with 10 % FBS. The next day, the media was replaced with  
297 300  $\mu$ l fresh media. Cells were pretreated for 10 min with the respective inhibitor at the indicated  
298 concentrations or DMSO as control, followed by the addition of 500  $\mu$ M IBMX for cAMP  
299 accumulation. After 5 min, the media was removed and the cells lysed with 250  $\mu$ l 0.1 M HCl by  
300 shaking at 700 rpm for 10 min. Cell lysates were centrifuged at 2000xg for 3 min and the cAMP  
301 in the supernatant was quantified using the Direct cAMP ELISA Kit (Enzo) according to the  
302 manufacturer's instructions.

303 WT and sAC KO MEFs ( $3 \times 10^6$  cells/ml) in suspension were divided into 300  $\mu$ l aliquots and  
304 incubated at 37°C for one hour. Cells were preincubated for 10 min with 5  $\mu$ M TDI-10229 or DMSO  
305 as control, followed by the addition of 150  $\mu$ M IBMX for cAMP accumulation. After 5 min, 150  $\mu$ l  
306 of cells were transferred to a fresh tube containing 150  $\mu$ l 0.1 M HCl and lysed for 10 min. Cell  
307 lysates were centrifuged at 2000xg for 3 min and the cAMP in the supernatant quantified using  
308 the Direct cAMP ELISA Kit (Enzo) according to the manufacturer's instructions.

309

310 **Sperm preparation**

311 Mouse sperm were isolated by incision of the cauda epididymis followed by a swim-out in  
312 500  $\mu$ l TYH medium (in mM: 135 NaCl, 4.7 KCl, 1.7 CaCl<sub>2</sub>, 1.2 KH<sub>2</sub>PO<sub>4</sub>, 1.2 MgSO<sub>4</sub>, 5.6 glucose,  
313 0.56 pyruvate, 10 HEPES, pH 7.4 adjusted at 37°C with NaOH), prewarmed at 37°C. After 15 min  
314 swim-out at 37°C, sperm from two caudae were combined, washed two times with TYH buffer by  
315 centrifugation at 700xg for 5 min, and counted using a hemacytometer. For capacitation, sperm  
316 were incubated for 90 min in TYH containing 3 mg/ml BSA and 25 mM NaHCO<sub>3</sub> in a 37°C, 5%  
317 CO<sub>2</sub> incubator.

318 Samples of human semen were obtained from healthy volunteers with their prior written consent.  
319 Only samples that met the WHO 2010 criteria for normal semen parameters (ejaculated volume  
320  $\geq 1.5$  mL, sperm concentration  $\geq 15$  million/mL, motility  $\geq 40\%$ , progressive motility  $\geq 32\%$ , normal  
321 morphology  $\geq 4\%$ ) were included in this study. Sperm were purified by "swim-up" procedure in  
322 human tubular fluid (HTF) (in mM: 97.8 NaCl, 4.69 KCl, 0.2 MgSO<sub>4</sub>, 0.37 KH<sub>2</sub>PO<sub>4</sub>, 2.04 CaCl<sub>2</sub>,  
323 0.33 Na-pyruvate, 21.4 lactic acid, 2.78 glucose, 21 HEPES, pH 7.4 adjusted at 37°C with NaOH).  
324 0.5 to 1 ml of liquefied semen was layered in a 50 ml falcon tube below 7 ml HTF. The tubes were  
325 incubated at a tilted angle of 45° at 37°C and 15 % CO<sub>2</sub> for 60. Motile sperm were allowed to  
326 swim up into the HTF layer, while immotile sperm, as well as other cells or tissue debris, did

327 remain in the ejaculate fraction. A maximum of 5 ml of the HTF layer was transferred to a fresh  
328 falcon tube and washed twice in HTF by centrifugation (700 x g, 20 min, RT). The purity and  
329 vitality of each sample was controlled via light microscopy, the cell number was determined using  
330 a hematocytometer and adjusted to a concentration of  $1 \times 10^7$  cells/ml. For capacitation, sperm  
331 were incubated in HTF with 72.8 mM NaCl containing 25 mM  $\text{NaHCO}_3$  and 3 mg/ml HSA (Irvine  
332 Scientific) for 90 min to 3 h.

333

### 334 **cAMP quantification**

335 Aliquots of  $2 \times 10^6$  WT or sAC KO sperm were incubated for the indicated time in the presence or  
336 absence of 5  $\mu\text{M}$  TDI-10229 in non-capacitating or capacitating TYH buffer; 0.1 % DMSO was  
337 used as vehicle control. Aliquots of  $2 \times 10^6$  human sperm were incubated for the indicated time in  
338 the presence or absence of 1  $\mu\text{M}$  TDI-10229 in non-capacitating or capacitating TYH buffer; 0.1  
339 % DMSO was used as vehicle control. Sperm were sedimented by centrifugation at 2,000xg for  
340 3 min and lysed in 200  $\mu\text{l}$  HCl for 10 min. Sperm lysates were centrifuged at 2,000xg for 3 min  
341 and the cAMP in the supernatant was acetylated and quantified using the Direct cAMP ELISA Kit  
342 (Enzo) according to the manufacturer's instructions.

### 343 **Western blot analysis**

344 Aliquots of  $2 \times 10^6$  WT or sAC KO sperm were incubated for 45 min (PKA Western blot) or 90 min  
345 (pY Western blot) in the presence or absence of indicated concentrations of TDI-10229 in non-  
346 capacitating or capacitating TYH buffer; 0.1 % DMSO was used as vehicle control. Aliquots of  
347  $2 \times 10^6$  human sperm were incubated for 90 min in the presence or absence of indicated  
348 concentrations of TDI-10229 in non-capacitating or capacitating HTF buffer; 0.1 % DMSO was  
349 used as vehicle control. To rescue intracellular cAMP levels, sperm were additionally incubated  
350 in the presence of 5 mM db-cAMP and 500  $\mu\text{M}$  IBMX. Sperm were washed with 1 ml PBS and  
351 sedimented by centrifugation at 2,000xg for 3 min. The sedimented sperm were resuspended in  
352 15  $\mu\text{l}$  2x Laemmli sample buffer<sup>41</sup>, heated for 5 min at 95°C, supplemented with 8  $\mu\text{l}$   $\beta$ -  
353 mercaptoethanol and heated again for 5 min at 95°C. For Western blot analysis, proteins were  
354 transferred onto PVDF membranes (Thermo Scientific), probed with antibodies, and analyzed  
355 using a chemiluminescence detection system. Image lab (Bio-Rad) was used for densitometric  
356 analysis of Western blots.

357

358

359

360 **pH assay**

361 Sperm intracellular pH was determined as previously described<sup>42</sup>. Sperm samples incubated for  
362 60 min in the presence or absence of TDI-10229 in non-capacitating or capacitating TYH or HTF  
363 buffer were incubated in the dark for additional 10 min with 0.5  $\mu$ M BCECF-AM (mouse sperm)  
364 and 0.1  $\mu$ M BCECF-AM (human sperm). To remove excess dye, samples were washed with the  
365 respective buffer by centrifugation at 700xg for 5 min and resuspended in non-capacitating TYH  
366 or HTF with and without bicarbonate and with or without TDI-10229. For each condition, high  
367 potassium-buffered solutions were used to calibrate the pH. 5  $\mu$ M nigericin was added to each  
368 condition to equilibrate the intracellular and extracellular pH and to create a pH calibration curve.  
369 Fluorescence of BCECF was recorded as individual cellular events on a FACSCanto II TM  
370 cytometer (Becton Dickinson) (Ex: 505 nm, Em: 530/30 nm). Sperm intracellular pH<sub>i</sub> was  
371 calculated by linearly interpolating the median of the histogram of BCECF fluorescence of the  
372 unknown sample to the calibration curve.

373

374 **Isolation of mouse *zone pellucida***

375 For *zonae pellucidae* isolation, female mice were superovulated by intraperitoneal injection of 10  
376 I.U. human chorionic gonadotropin 3 days before the experiment. 14 h before oocyte isolation,  
377 mice were injected with 10 I.U. pregnant mare's serum gonadotropin. Mice were sacrificed by  
378 cervical dislocation and oviducts were dissected. Cumulus-enclosed oocytes were separated  
379 from the oviducts and placed into TYH buffer containing 300  $\mu$ g/ml hyaluronidase. After 15 min,  
380 cumulus-free oocytes were transferred into fresh buffer and washed twice. *Zonae pellucidae* and  
381 oocytes were separated by shear forces generated by expulsion from 50 nm pasteur pipettes.  
382 *Zona pellucidae* were counted and transferred into fresh buffer.

383

384 **Acrosome reaction assay**

385 For analysis of acrosomal exocytosis, 100  $\mu$ l  $1 \times 10^6$  sperm were capacitated for 90 min in TYH  
386 buffer supplemented with 3 mg/ml BSA and 25 mM NaHCO<sub>3</sub>. 5  $\mu$ M TDI-10229 was added with  
387 capacitating buffer; 1 % DMSO was used as vehicle control. Acrosome reaction was induced by  
388 incubating mouse sperm with 50 mouse *zona pellucida* and human sperm with 10  $\mu$ M  
389 progesterone for 15 min at 37 °C. The sperm suspensions were sedimented by centrifugation at  
390 2,000xg for 5 min and the sedimented sperm were resuspended in 100  $\mu$ l PBS buffer. Samples  
391 were air-dried on microscope slides and fixed for 30 minutes in 100% ethanol at RT. For acrosome  
392 staining, mouse and human sperm were incubated for 30 min in the dark with 5  $\mu$ g/ml PNA-FITC  
393 and 5  $\mu$ g/ml PSA-FITC in PBS. Sperm were counterstained with 2  $\mu$ g/ml DAPI. After curing, slides

394 were analyzed using a Zeiss LSM 880 Laser Scanning Confocal Microscope; images were  
395 captured with two PMTs and one GaAsP detector using the ZEN Imaging software. For each  
396 condition, at least 600 cells were analyzed using ImageJ 1.52.

397

### 398 **Single-sperm motility analysis**

399 Mouse and human sperm tethered to the glass surface were observed in shallow perfusion  
400 chambers with 200  $\mu\text{m}$  depth. Mouse sperm were measured in the absence of BSA since BSA  
401 affected the efficiency of TDI-10229, human sperm were measured in the presence of 3  $\mu\text{l/ml}$   
402 HSA since tethered human sperm only remain motile in the presence of HSA. An inverted dark-  
403 field video microscope (IX73; Olympus) with a 10 x objective (mouse sperm) and a 20 x objective  
404 (human sperm) (UPLSAPO, NA 0.8; Olympus) was combined with a high-speed camera (ORCA  
405 Fusion; Hamamatsu). Dark-field videos were recorded with a frame rate of 200 Hz. The  
406 temperature of the heated stage was set to 37°C (stage top incubator WSKMX; TOKAI HIT). The  
407 images were preprocessed with the ImageJ plugin SpermQ Preparator (Gaussian blur with sigma  
408 0.5 px; Subtract background method with radius 5 px) and analyzed using the ImageJ plugin  
409 SpermQ<sup>43</sup>. The beat frequency was determined from the highest peak in the frequency spectrum  
410 of the curvature time course, obtained by Fast Fourier Transform.

411

### 412 ***In vitro* fertilization**

413 We performed IVF experiments with both C57Bl/6 and CD1 mice. Superovulation in females was  
414 induced as described above. HTF medium (EmbryoMax Human Tubal Fluid; Merck Millipore) was  
415 mixed 1:1 with mineral oil (Sigma-Aldrich) and equilibrated overnight at 37°C. On the day of  
416 preparation, sperm were capacitated for 90 min in HTF. 100  $\mu\text{l}$  drops of HTF were covered with  
417 the medium/oil mixture and 10<sup>5</sup> sperm were added to each drop. Cumulus-enclosed oocytes were  
418 prepared from the oviducts of superovulated females and added to the drops. After 4 hr at 37°C  
419 and 5% CO<sub>2</sub>, oocytes were transferred to fresh HTF. The number of 2-cell stages was evaluated  
420 after 24 hr.

421

### 422 **Statistical analysis**

423 Statistical analyses were performed using GraphPad Prism 5 (Graph-Pad Software). All data are  
424 shown as the mean  $\pm$  SEM. Statistical significance between two groups was determined using  
425 two-tailed, unpaired t-tests with Welch correction, and statistical significance between multiple  
426 groups using one-way ANOVA with Dunnett correction. Differences were considered to be  
427 significant if \*P < 0.05, \*\*P < 0.01, \*\*\*P < 0.001, and \*\*\*\*P < 0.0001.



428 **ACKNOWLEDGMENT**

429 The authors wish to thank Marc Baum for helpful insight into intravaginal delivery devices; Hannes  
430 Buck, Anna Gorovyy, Clemens Steegborn, and the rest of the Levin/Buck laboratory for helpful  
431 advice on the manuscript. The authors gratefully acknowledge the support provided by the Tri-  
432 Institutional Therapeutics Discovery Institute (TDI), a 501(c)(3) organization. TDI receives financial  
433 support from Takeda Pharmaceutical Company, TDI's parent institutes (Memorial Sloan Kettering  
434 Cancer Center, The Rockefeller University and Weill Cornell Medicine) and from a generous  
435 contribution from Mr. Lewis Sanders and other philanthropic sources.

436

437 **AUTHOR CONTRIBUTIONS**

438 Conceptualization: MB, PTM, LRL, JB  
439 Methodology: MB, TR, CR, LPM, JNH  
440 Investigation: MB, LB, TR, CR, LCPM, JF, NK  
441 Visualization: MB  
442 Supervision: LRL, JB  
443 Writing – original draft: MB, LRL, JB, PTM, CMS, DW

444

445

446 **FUNDING**

447

448 This work was funded by NIH; NICHD HD100549 & HD088571 (JB & LRL); Male Contraceptive  
449 Initiative (MB); PhD fellowship from the Boehringer Ingelheim Fonds (JNH); Germany Research  
450 Foundation under Germany's Excellence Strategy – EXC2151 – 390873048, SPP1926,  
451 SPP1726, TRR83/SFB, FOR2743, SFB1454 (DW); FONCyT Argentina PICT 2017-3217 and  
452 PICT 2019-1779 (DK); NIH-R01HD069631 (CMS).

453

454 **COMPETING FINANCIAL INTEREST**

455 All authors declare that they have no conflicts of interest with the contents of this article.

456

457

458

459 **Figures**

460 **Figure 1**

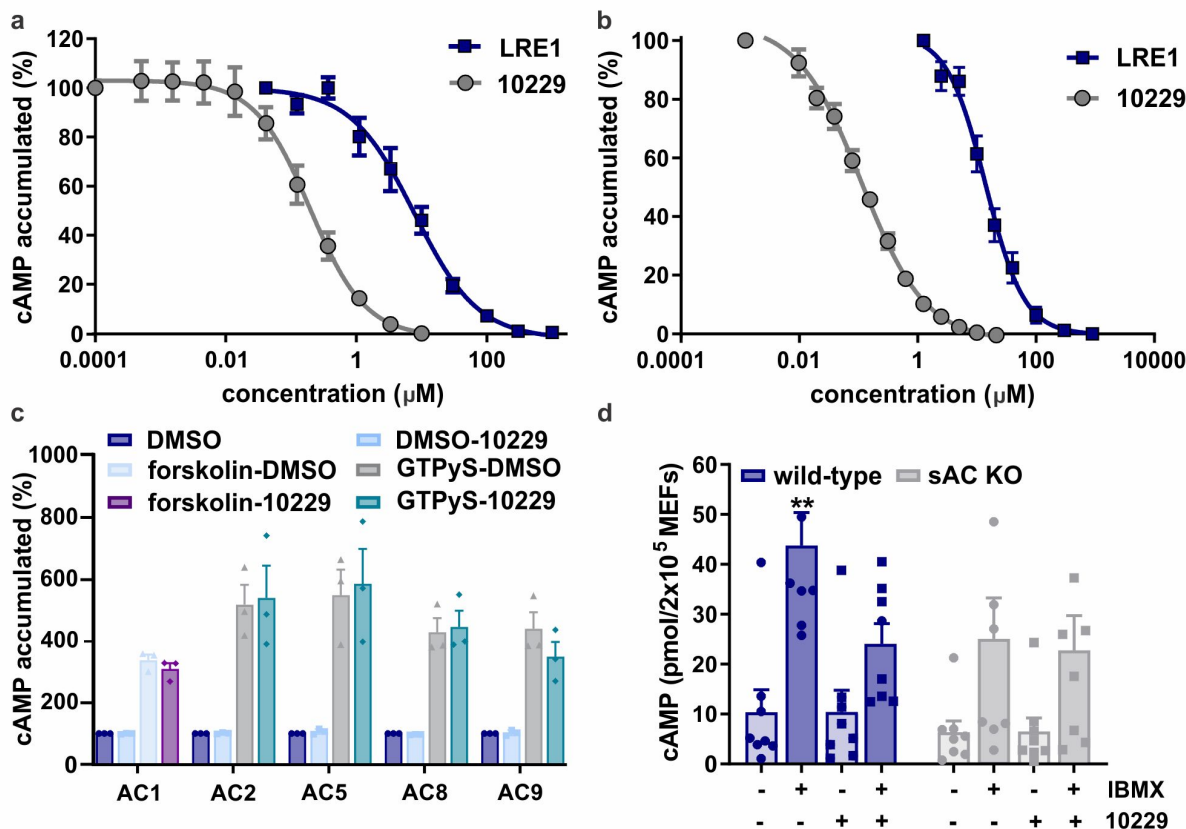

461

462 **Figure 1: TDI-10229 is more potent than LRE1 and does not inhibit tmACs**

(a) Concentration-response curves of LRE1 and TDI-10229 on purified recombinant human sAC protein in the presence of 1 mM ATP, 2 mM  $\text{Ca}^{2+}$ , 4 mM  $\text{Mg}^{2+}$ , and 40 mM  $\text{HCO}_3^-$ , normalized to the respective DMSO-treated control; mean  $\pm$  SEM (n=5). (b) Concentration-response curves of LRE1 and TDI-10229 on sAC-overexpressing 4/4 cells. Cellular accumulation of cAMP measured in cells treated with 500  $\mu\text{M}$  IBMX for 5 min, normalized to the respective DMSO-treated control; mean  $\pm$  SEM (n=5). (c) AC activities of HEK 293 cell lysates overexpressing each of the indicated tmACs activated by 50  $\mu\text{M}$  forskolin or 100  $\mu\text{M}$  GTPyS in the absence or presence of 10  $\mu\text{M}$  TDI-10229, normalized to the respective unstimulated DMSO-treated control; mean  $\pm$  SEM (n=3). (d) Cellular accumulation of cAMP in wild-type and sAC KO MEFs treated with and without 500  $\mu\text{M}$  IBMX for 10 min in the absence or presence of 5  $\mu\text{M}$  TDI-10229; mean  $\pm$  SEM (n=8). Differences between conditions were analyzed using (c) two-tailed, unpaired t-test or (d) one-way ANOVA compared to respective DMSO-treated control, \* $P < 0.05$ , \*\* $P < 0.01$ , \*\*\* $P < 0.001$ , \*\*\*\* $P < 0.0001$ .

463 **Figure 2**

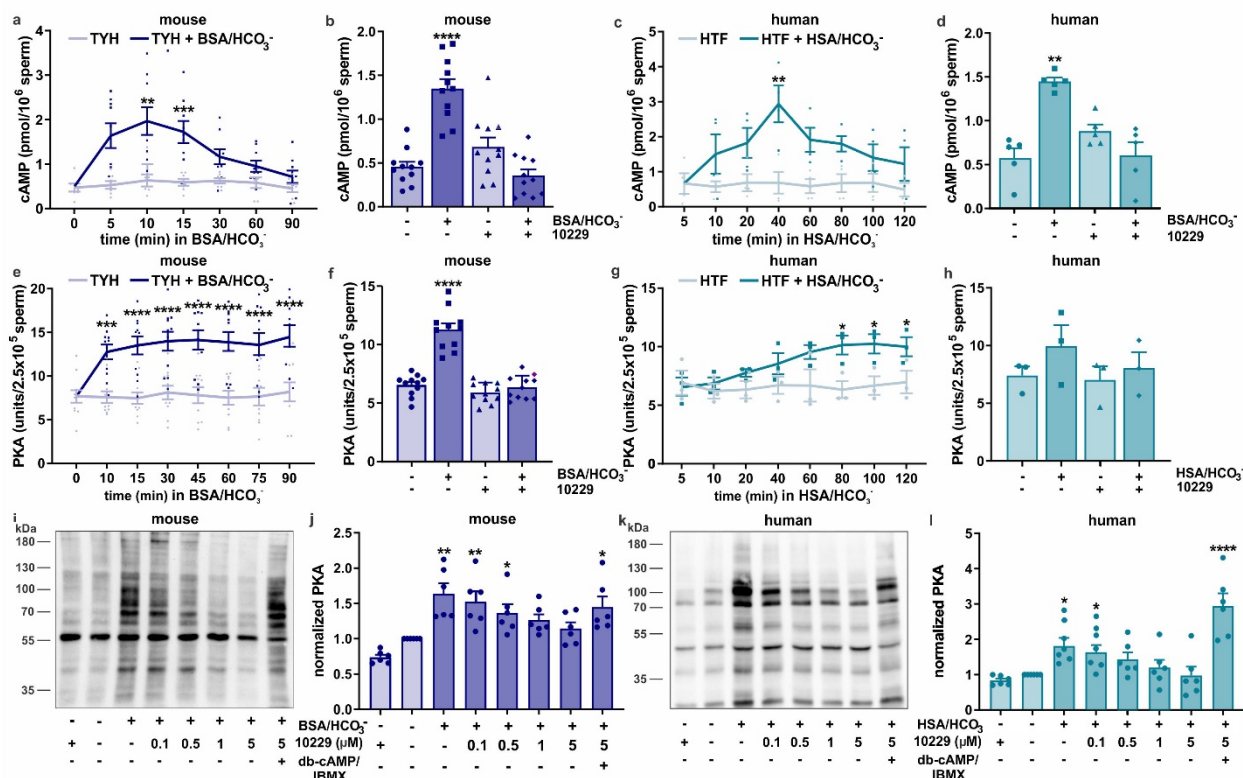

464  
465 **Figure 2: sAC inhibition by TDI-10229 prevents capacitation-induced cAMP increase and**  
466 **PKA activation in mouse and human sperm**

(a,c) Intracellular cAMP levels in mouse and human sperm detected at different time points during capacitation after incubation in (a) TYH with 25 mM HCO<sub>3</sub><sup>-</sup> and 3 mg/ml BSA (0 - 90 min) or in (c) HTF with 25 mM HCO<sub>3</sub><sup>-</sup> and 3 μl/ml HSA (0 - 120 min), time-course in non-capacitated sperm is shown as control; mean ± SEM (n≥5). (b,d) Intracellular cAMP levels in (b) mouse (at 10 minutes) and (d) human sperm (at 40 min) in non-capacitating or capacitating media in the absence or presence of 5 μM TDI-10229; mean + SEM (n≥4). (e,g) Protein kinase A activity levels in (e) mouse and (g) human sperm detected at different time points during capacitation after incubation in non-capacitating or capacitating media (mouse: 0 - 90 min, human: 0 - 120 min); mean ± SEM (n≥3). (f,h) Protein kinase A activity levels in (f) mouse (at 45 minutes) and (h) human sperm (at 60 minutes) in non-capacitating or capacitating media in the absence or presence of 5 μM TDI-10229; mean + SEM (n≥3). (i,k) Phosphorylation of PKA substrates of non-capacitated and capacitated (i) mouse and (k) human sperm in the absence or presence of different concentrations of TDI-10229, rescued with 5 mM db-cAMP/500 μM IBMX, shown are representative Western blots. (j,l) Quantitation of PKA substrate phosphorylation Western blots of (j) mouse and (l) human sperm, normalized to DMSO-treated non-capacitated control; mean ± SEM (n≥6). Differences between conditions were analyzed using one-way ANOVA compared to the first time point (a,b), first time-point of non-capacitated control (e,f) or DMSO-treated non-capacitated control (c,d,g,h,j,l), \*P<0.05, \*\*P<0.01, \*\*\*P<0.001, \*\*\*\*P<0.0001.

467

468 **Figure 3**

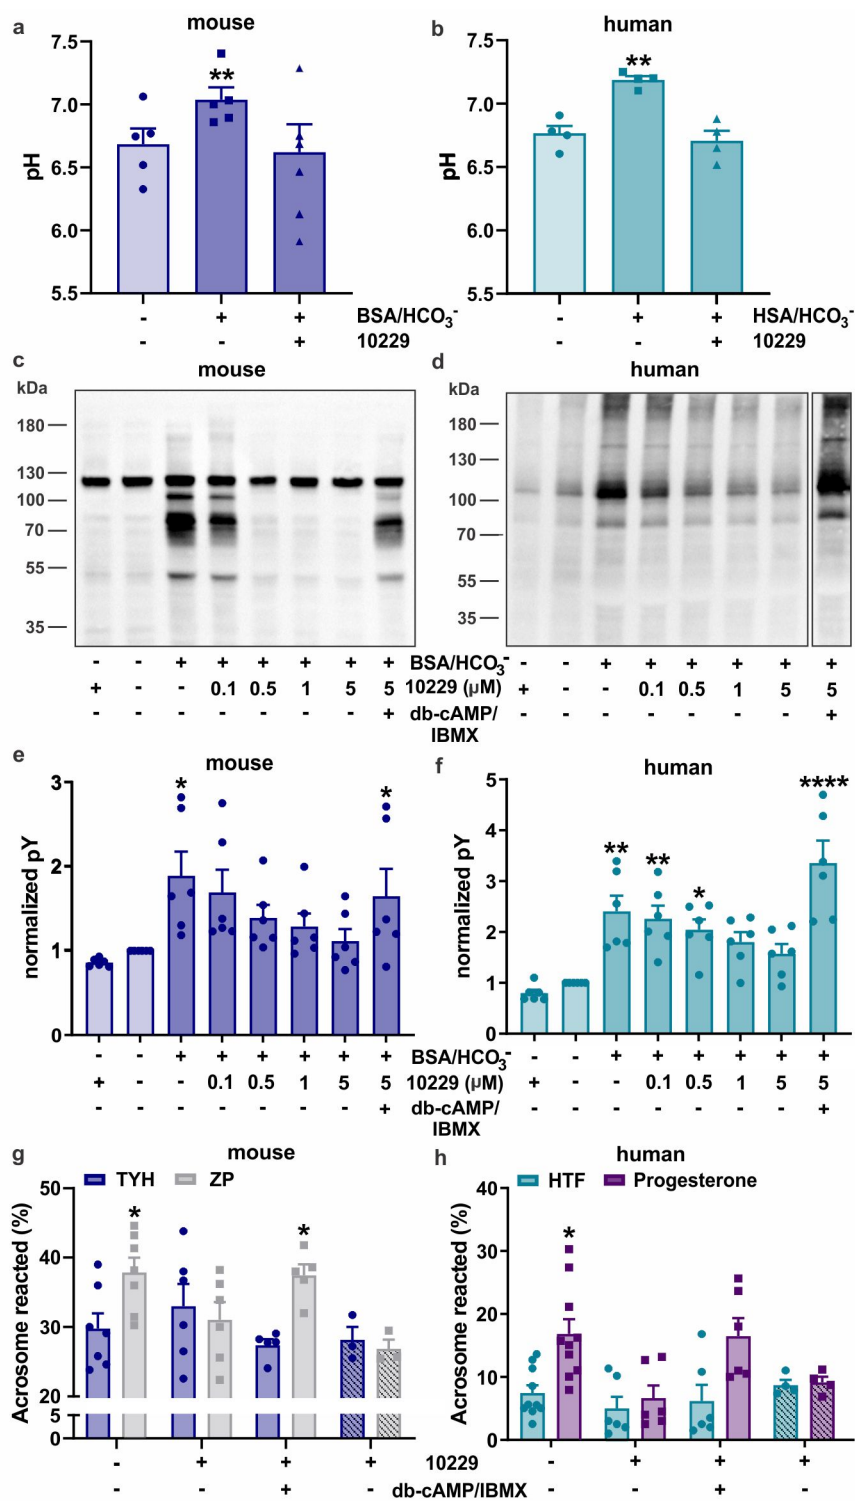

469

470 **Figure 3: sAC inhibition by TDI-10229 prevents capacitation in mouse and human sperm**

(a-b) Intracellular pH of non-capacitated and capacitated (a) mouse and (b) human sperm in the absence or presence of 5  $\mu\text{M}$  TDI-10229; mean  $\pm$  SEM (n=5). (c,d) Phosphorylation of tyrosine residue Western blots of non-capacitated and capacitated (c) mouse and (d) human sperm in the absence or presence of different concentrations of TDI-10229, rescued with 5 mM db-cAMP/500  $\mu\text{M}$  IBMX, shown are representative Western Blots. (e,f) Quantitation of tyrosine phosphorylation Western blots of (e) mouse and (f) human sperm, normalized to DMSO-treated non-capacitated control; mean  $\pm$  SEM (n $\geq$ 6). Differences between conditions were analyzed using one-way ANOVA compared to DMSO-treated non-capacitated control, \*P<0.05, \*\*P< 0.01, \*\*\*P<0.001, \*\*\*\*P<0.0001.

471

#### 472 Figure 4

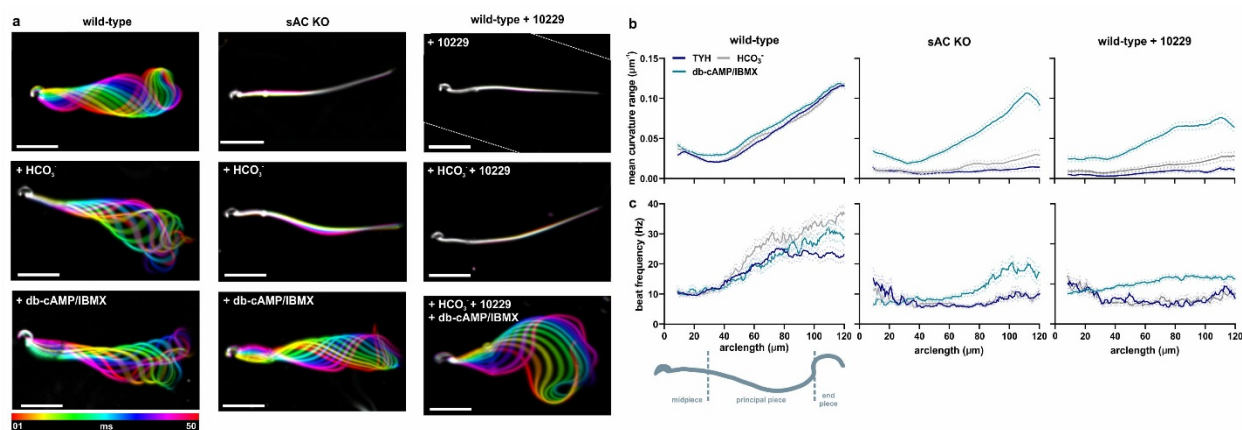

473

#### 474 Figure 4: Characterization of mouse sperm beating pattern in the absence or after 475 inhibition of sAC

476 (a) Flagellar waveform of wild-type sperm in the absence or presence of 5  $\mu\text{M}$  TDI-10229 and  
477 sAC KO sperm before and after stimulation with 25 mM NaHCO<sub>3</sub> or 5 mM db-cAMP/500  $\mu\text{M}$  IBMX.  
478 Superimposed color-coded frames taken every 5 ms, illustrating one flagellar beat cycle; scale  
479 bar: 30  $\mu\text{m}$ . (b,c) (b) Mean amplitude of the curvature angle and (c) flagellar beat frequency along  
480 the flagellum of wild-type sperm in the absence or presence of 5  $\mu\text{M}$  TDI-10229 and sAC KO  
481 sperm. Solid lines indicate the time-averaged values, dotted lines the SEM, n = 3,  $\geq$ 50 individual  
482 sperm from 3 different mice.

483

484

485

486

487

488

489

490

491

492

493

494 **Figure 5**

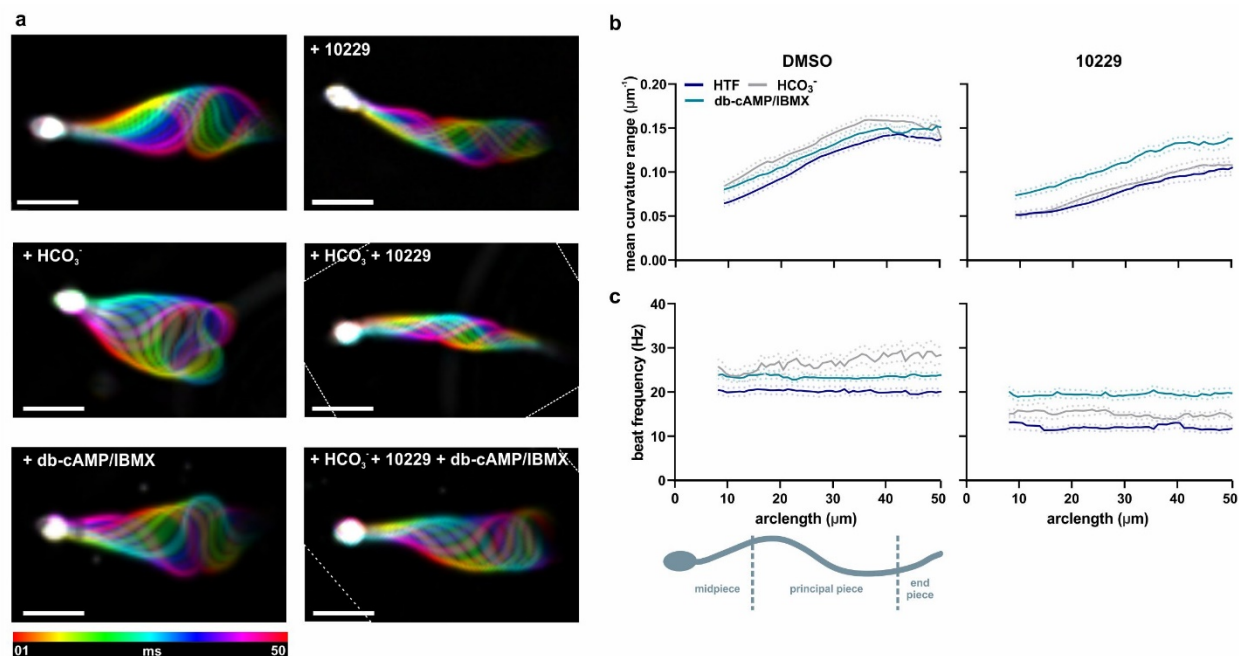

495  
496  
497  
498

**Figure 5: sAC inhibition by TDI-10229 prevents bicarbonate-induced changes in the flagellar beating pattern of human sperm**

499 **(a)** Flagellar waveform of human sperm incubated in the presence of 3 μl/ml human serum  
500 albumin in the absence or presence of 0.2 μM TDI-10229 before and after stimulation with 25 mM  
501 NaHCO<sub>3</sub> or 5 mM db-cAMP/500 μM IBMX. Superimposed color-coded frames taken every 5 ms,  
502 illustrating one flagellar beat cycle; scale bar: 15 μm. **(b,c)** Mean flagellar beat frequency and  
503 **(c)** mean amplitude of the curvature angle along the flagellum of mouse sperm in the absence or  
504 presence of 5 μM TDI-10229 before and after stimulation with 25 mM NaHCO<sub>3</sub> or 5 mM  
505 db-cAMP/500 μM IBMX. Solid lines indicate the time-averaged values, dotted lines the SEM, n = 3,  
506 ≥50 individual sperm from 3 different donors.

507  
508  
509  
510  
511  
512  
513  
514  
515  
516

517 **Figure 6**

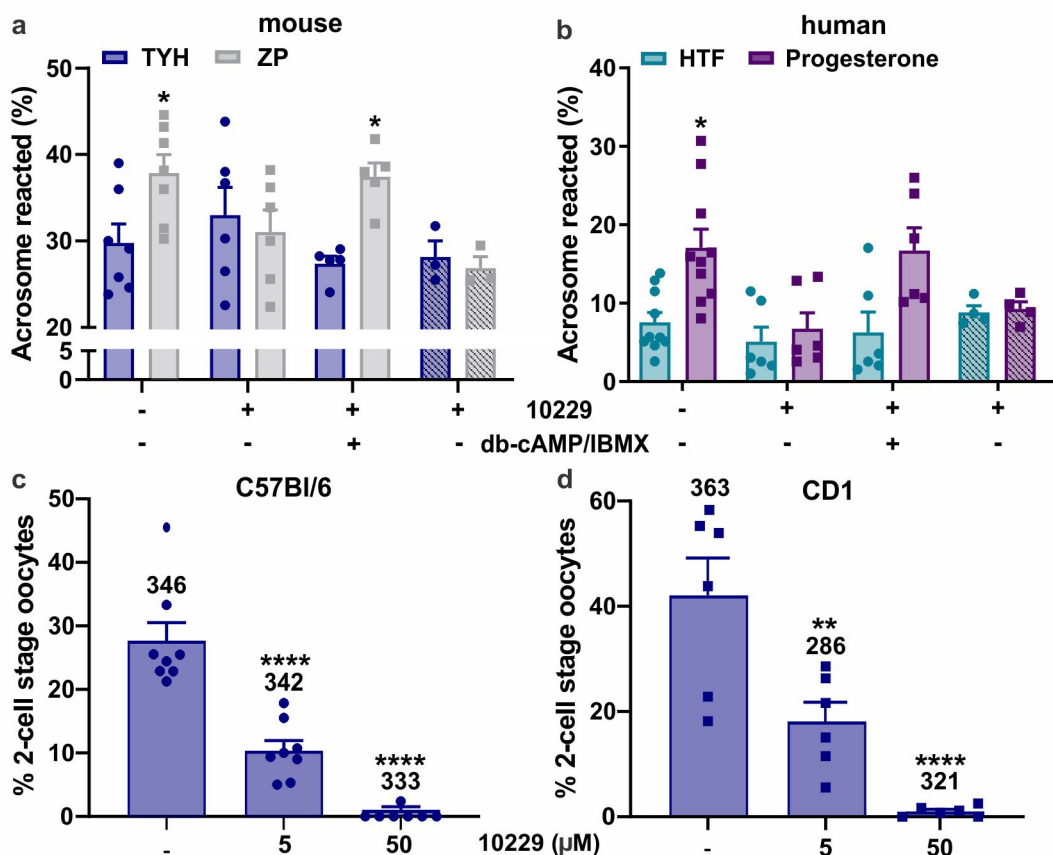

518

519 **Figure 6: TDI-10229 blocks acrosome reaction post capacitation and fertilization of mouse**  
 520 **sperm *in vitro***

521 **(a)** Acrosome reaction in wild-type mouse sperm evoked by 50 isolated zona pellucidae after  
 522 incubation for 90 min in capacitating media in the absence or presence of 5  $\mu$ M TDI-10229,  
 523 rescued with 5 mM db-cAMP/500  $\mu$ M IBMX; mean  $\pm$  SEM (n $\geq$ 3). **(b)** Acrosome reaction in human  
 524 sperm evoked by 10  $\mu$ M progesterone after incubation for 180 min in capacitating media in the  
 525 absence or presence of 1  $\mu$ M TDI-10229, rescued with 5 mM db-cAMP/500  $\mu$ M IBMX. For the  
 526 striped bars, TDI-10229 was added concomitantly with zona pellucidae or progesterone; mean  $\pm$   
 527 SEM (n $\geq$ 4). **(c,d)** Rate of two-cell stage oocytes after incubation of **(c)** C57Bl/6 and **(d)** CD1  
 528 mouse oocytes with capacitated C57Bl/6 and CD1 sperm, respectively in the absence or  
 529 presence of 5 or 50  $\mu$ M TDI-10229; mean  $\pm$  SEM (n=5), numbers indicate the total number of  
 530 oocytes from three independent experiments. Differences between conditions were analyzed  
 531 using one-way ANOVA compared to respective DMSO-treated control, \*P<0.05, \*\*P< 0.01,  
 532 \*\*\*P<0.001, \*\*\*\*P<0.0001.

533

534

535

536 **Table 1**

|                   | Basal (Hz) | + HCO <sub>3</sub> <sup>-</sup> (Hz) | + db-cAMP/IBMX (Hz) |
|-------------------|------------|--------------------------------------|---------------------|
| Mouse WT          | 24.3 ± 1.3 | 39.3 ± 1.8                           | 29.0 ± 2.0          |
| Mouse sAC KO      | 7.0 ± 0.5  | 7.7 ± 0.6                            | 15.1 ± 1.5          |
| Mouse + TDI-10229 | 10.4 ± 0.8 | 11.7 ± 1.8                           | 21.7 ± 0.8          |
| Human             | 20.1 ± 0.8 | 27.1 ± 0.9                           | 24.5 ± 0.6          |
| Human + TDI-10229 | 12.2 ± 0.8 | 14.5 ± 0.6                           | 19.5 ± 0.8          |

537

538 **Table 1: Beat frequencies of mouse and human sperm in the presence and absence of TDI-**  
539 **10229**

540 Beat frequencies were averaged over the distal 10 μm of the flagellum for mouse sperm and the  
541 distal 5 μm of the flagellum for human sperm, mouse sAC KO sperm are shown as control; mean  
542 ± SEM, n≥50 individual sperm from 3 different mice/donors.

543

544 **Movie 1:** Flagellar motility of WT mouse sperm before and after stimulation with 25 mM  
545 NaHCO<sub>3</sub> or 5 mM db-cAMP/500 μM IBMX.

546

547 **Movie 2:** Flagellar motility of sAC KO mouse sperm before and after stimulation with 25 mM  
548 NaHCO<sub>3</sub> or 5 mM db-cAMP/500 μM IBMX.

549

550 **Movie 3:** Flagellar motility of WT mouse sperm in the presence of 5 μM TDI-10229 before and  
551 after stimulation with 25 mM NaHCO<sub>3</sub> or 5 mM db-cAMP/500 μM IBMX.

552

553 **Movie 4:** Flagellar motility of human sperm before and after stimulation with 25 mM NaHCO<sub>3</sub> or  
554 5 mM db-cAMP/500 μM IBMX.

555

556 **Movie 5:** Flagellar motility of human sperm in the presence of 5 μM TDI-10229 before and after  
557 stimulation with 25 mM NaHCO<sub>3</sub> or 5 mM db-cAMP/500 μM IBMX.

558

559

560

561

562

563

564 **Supplementary Figures**



565 **Figure S1**

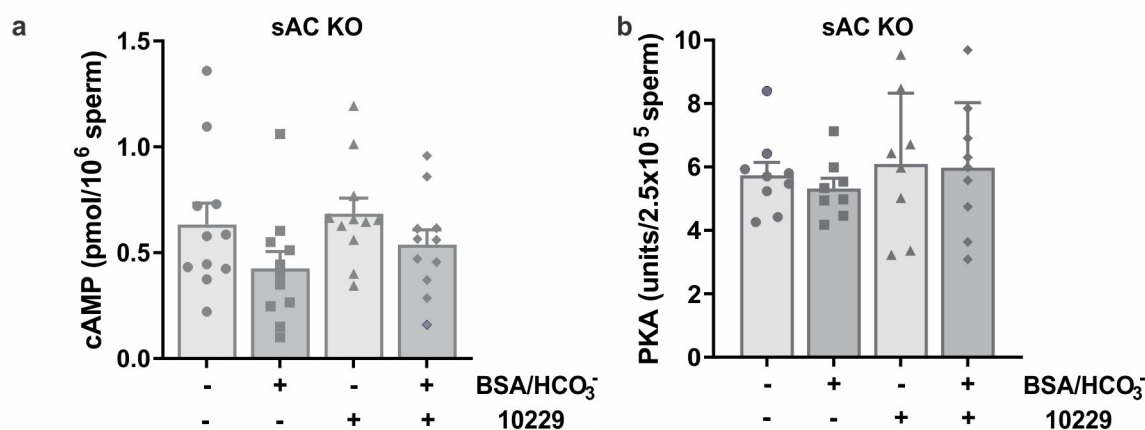

566

567 **Fig. S1: TDI-10229 is inert on sperm from sAC KO mice**

568 **(a)** Intracellular cAMP levels in sAC KO mouse sperm after incubation for 10 min in non-  
569 capacitating or capacitating media in the absence or presence of 5 μM TDI-10229; mean + SEM  
570 (n=11). **(b)** Protein kinase A activity levels in sAC KO mouse sperm after incubation for 45 min in  
571 non-capacitating or capacitating media in the absence or presence of 5 μM TDI-10229; mean +  
572 SEM (n=9). Differences between conditions were analyzed using one-way ANOVA compared to  
573 DMSO-treated control, \*P<0.05, \*\*P< 0.01, \*\*\*P<0.001, \*\*\*\*P<0.0001.

574

575

576

577

578

579

580

581

582

583

584

585

586

587

588

589 **References**

- 590 1 Balbach, M., Beckert, V., Hansen, J. N. & Wachten, D. Shedding light on the role of cAMP in  
591 mammalian sperm physiology. *Mol Cell Endocrinol* **468**, 111-120, doi:10.1016/j.mce.2017.11.008  
592 (2018).
- 593 2 Wennemuth, G., Carlson, A. E., Harper, A. J. & Babcock, D. F. Bicarbonate actions on flagellar and  
594 Ca<sup>2+</sup>-channel responses: initial events in sperm activation. *Development* **130**, 1317-1326  
595 (2003).
- 596 3 Buffone, M. G., Wertheimer, E. V., Visconti, P. E. & Krapf, D. Central role of soluble adenylyl  
597 cyclase and cAMP in sperm physiology. *Biochim Biophys Acta* **1842**, 2610-2620,  
598 doi:10.1016/j.bbadis.2014.07.013 (2014).
- 599 4 Esposito, G. *et al.* Mice deficient for soluble adenylyl cyclase are infertile because of a severe  
600 sperm-motility defect. *Proc Natl Acad Sci U S A* **101**, 2993-2998, doi:10.1073/pnas.0400050101  
601 (2004).
- 602 5 Hess, K. C. *et al.* The "soluble" adenylyl cyclase in sperm mediates multiple signaling events  
603 required for fertilization. *Dev Cell* **9**, 249-259, doi:10.1016/j.devcel.2005.06.007 (2005).
- 604 6 Xie, F. *et al.* Soluble adenylyl cyclase (sAC) is indispensable for sperm function and fertilization.  
605 *Dev Biol* **296**, 353-362 (2006).
- 606 7 Akbari, A. *et al.* ADCY10 frameshift variant leading to severe recessive asthenozoospermia and  
607 segregating with absorptive hypercalciuria. *Hum Reprod* **34**, 1155-1164,  
608 doi:10.1093/humrep/dez048 (2019).
- 609 8 Buck, J., Sinclair, M. L., Schapal, L., Cann, M. J. & Levin, L. R. Cytosolic adenylyl cyclase defines a  
610 unique signaling molecule in mammals. *Proc Natl Acad Sci U S A* **96**, 79-84 (1999).
- 611 9 Wiggins, S. V., Steegborn, C., Levin, L. R. & Buck, J. Pharmacological modulation of the CO.  
612 *Pharmacol Ther* **190**, 173-186, doi:10.1016/j.pharmthera.2018.05.008 (2018).
- 613 10 Ramos-Espiritu, L. *et al.* Discovery of LRE1 as a specific and allosteric inhibitor of soluble adenylyl  
614 cyclase. *Nat Chem Biol* **12**, 838-844, doi:10.1038/nchembio.2151 (2016).
- 615 11 Fushimi, M. *et al.* (In preparation, 2021).
- 616 12 Zippin, J. H. *et al.* CO<sub>2</sub>/HCO<sub>3</sub><sup>-</sup> and calcium-regulated soluble adenylyl cyclase as a physiological  
617 ATP sensor. *J Biol Chem* **288**, 33283-33291, doi:10.1074/jbc.M113.510073 (2013).
- 618 13 Bitterman, J. L., Ramos-Espiritu, L., Diaz, A., Levin, L. R. & Buck, J. Pharmacological distinction  
619 between soluble and transmembrane adenylyl cyclases. *J Pharmacol Exp Ther* **347**, 589-598,  
620 doi:10.1124/jpet.113.208496 (2013).
- 621 14 Levine, N. & Marsh, D. J. Micropuncture studies of the electrochemical aspects of fluid and  
622 electrolyte transport in individual seminiferous tubules, the epididymis and the vas deferens in  
623 rats. *J Physiol* **213**, 557-570, doi:10.1113/jphysiol.1971.sp009400 (1971).
- 624 15 Pitts, R. *Physiology of the Kidney and Body Fluids.*, Vol. 3 (1974).
- 625 16 Battistone, M. A. *et al.* Functional human sperm capacitation requires both bicarbonate-  
626 dependent PKA activation and down-regulation of Ser/Thr phosphatases by Src family kinases.  
627 *Mol Hum Reprod* **19**, 570-580, doi:10.1093/molehr/gat033 (2013).
- 628 17 Mukherjee, S. *et al.* A novel biosensor to study cAMP dynamics in cilia and flagella. *Elife* **5**,  
629 doi:10.7554/eLife.14052 (2016).
- 630 18 Nishigaki, T. *et al.* Intracellular pH in sperm physiology. *Biochem Biophys Res Commun* **450**,  
631 1149-1158, doi:10.1016/j.bbrc.2014.05.100 (2014).
- 632 19 Puga Molina, L. C. *et al.* Molecular Basis of Human Sperm Capacitation. *Front Cell Dev Biol* **6**, 72,  
633 doi:10.3389/fcell.2018.00072 (2018).
- 634 20 Visconti, P. E. *et al.* Capacitation of mouse spermatozoa. I. Correlation between the capacitation  
635 state and protein tyrosine phosphorylation. *Development* **121**, 1129-1137 (1995).

- 636 21 Navarro, B., Kirichok, Y. & Clapham, D. E. KSper, a pH-sensitive K<sup>+</sup> current that controls sperm  
637 membrane potential. *Proc Natl Acad Sci U S A* **104**, 7688-7692, doi:10.1073/pnas.0702018104  
638 (2007).
- 639 22 Kirichok, Y., Navarro, B. & Clapham, D. E. Whole-cell patch-clamp measurements of spermatozoa  
640 reveal an alkaline-activated Ca<sup>2+</sup> channel. *Nature* **439**, 737-740, doi:10.1038/nature04417  
641 (2006).
- 642 23 Zeng, Y., Oberdorf, J. A. & Florman, H. M. pH regulation in mouse sperm: identification of Na<sup>(+)</sup>-,  
643 Cl<sup>(-)</sup>-, and HCO<sub>3</sub><sup>(-)</sup>-dependent and arylaminobenzoate-dependent regulatory mechanisms and  
644 characterization of their roles in sperm capacitation. *Dev Biol* **173**, 510-520,  
645 doi:10.1006/dbio.1996.0044 (1996).
- 646 24 Chávez, J. C., Darszon, A., Treviño, C. L. & Nishigaki, T. Quantitative Intracellular pH  
647 Determinations in Single Live Mammalian Spermatozoa Using the Ratiometric Dye SNARF-5F.  
648 *Front Cell Dev Biol* **7**, 366, doi:10.3389/fcell.2019.00366 (2019).
- 649 25 Luconi, M. *et al.* Tyrosine phosphorylation of the a kinase anchoring protein 3 (AKAP3) and  
650 soluble adenylylase are involved in the increase of human sperm motility by bicarbonate.  
651 *Biol Reprod* **72**, 22-32 (2005).
- 652 26 Raju, D. N. *et al.* Cyclic Nucleotide-Specific Optogenetics Highlights Compartmentalization of the  
653 Sperm Flagellum into cAMP Microdomains. *Cells* **8**, doi:10.3390/cells8070648 (2019).
- 654 27 Battistone, M. A. *et al.* Functional human sperm capacitation requires both bicarbonate-  
655 dependent PKA activation and down-regulation of Ser/Thr phosphatases by Src family kinases.  
656 *Mol Hum Reprod* **19**, 570-580, doi:10.1093/molehr/gat033 (2013).
- 657 28 Puga Molina, L. C. *et al.* Essential Role of CFTR in PKA-Dependent Phosphorylation,  
658 Alkalinization, and Hyperpolarization During Human Sperm Capacitation. *J Cell Physiol* **232**,  
659 1404-1414, doi:10.1002/jcp.25634 (2017).
- 660 29 Lucchesi, O., Ruete, M. C., Bustos, M. A., Quevedo, M. F. & Tomes, C. N. The signaling module  
661 cAMP/Epac/Rap1/PLC $\epsilon$ /IP3 mobilizes acrosomal calcium during sperm exocytosis. *Biochim*  
662 *Biophys Acta* **1863**, 544-561, doi:10.1016/j.bbamcr.2015.12.007 (2016).
- 663 30 Suarez, S. S. & Pacey, A. A. Sperm transport in the female reproductive tract. *Hum Reprod*  
664 *Update* **12**, 23-37, doi:10.1093/humupd/dmi047 (2006).
- 665 31 Neves, J. d. & Sarmiento, B. (Jenny Stanford Publishing, 2014).
- 666 32 Robinson, J. A. *et al.* Comparison of the Pharmacokinetics and Pharmacodynamics of Single-Dose  
667 Tenofovir Vaginal Film and Gel Formulation (FAME 05). *J Acquir Immune Defic Syndr* **77**, 175-  
668 182, doi:10.1097/QAI.0000000000001587 (2018).
- 669 33 Politch, J. A. *et al.* Safety, acceptability, and pharmacokinetics of a monoclonal antibody-based  
670 vaginal multipurpose prevention film (MB66): A Phase I randomized trial. *PLoS Med* **18**,  
671 e1003495, doi:10.1371/journal.pmed.1003495 (2021).
- 672 34 Clark, J. T. *et al.* Engineering a segmented dual-reservoir polyurethane intravaginal ring for  
673 simultaneous prevention of HIV transmission and unwanted pregnancy. *PLoS One* **9**, e88509,  
674 doi:10.1371/journal.pone.0088509 (2014).
- 675 35 Thurman, A. R. *et al.* Randomized, placebo controlled phase I trial of safety, pharmacokinetics,  
676 pharmacodynamics and acceptability of tenofovir and tenofovir plus levonorgestrel vaginal rings  
677 in women. *PLoS One* **13**, e0199778, doi:10.1371/journal.pone.0199778 (2018).
- 678 36 Baum, M. M. *et al.* An intravaginal ring for the simultaneous delivery of multiple drugs. *J Pharm*  
679 *Sci* **101**, 2833-2843, doi:10.1002/jps.23208 (2012).
- 680 37 Vincent, K. L. *et al.* Safety and pharmacokinetics of single, dual, and triple antiretroviral drug  
681 formulations delivered by pod-intravaginal rings designed for HIV-1 prevention: A Phase I trial.  
682 *PLoS Med* **15**, e1002655, doi:10.1371/journal.pmed.1002655 (2018).

- 683 38 Levin, L. R. *et al.* The *Drosophila* learning and memory gene *rutabaga* encodes a  
684  $\text{Ca}^{2+}$ /Calmodulin-responsive adenylyl cyclase. *Cell* **68**, 479-489 (1992).
- 685 39 Levin, L. R. & Reed, R. R. Identification of functional domains of adenylyl cyclase using in vivo  
686 chimeras. *J Biol Chem* **270**, 7573-7579, doi:10.1074/jbc.270.13.7573 (1995).
- 687 40 Litvin, T. N., Kamenetsky, M., Zarifyan, A., Buck, J. & Levin, L. R. Kinetic properties of "soluble"  
688 adenylyl cyclase. Synergism between calcium and bicarbonate. *J Biol Chem* **278**, 15922-15926,  
689 doi:10.1074/jbc.M212475200 (2003).
- 690 41 Laemmli, U. K. Cleavage of structural proteins during the assembly of the head of bacteriophage  
691 T4. *Nature* **227**, 680-685, doi:10.1038/227680a0 (1970).
- 692 42 Gunderson, S. J. *et al.* Machine-learning algorithm incorporating capacitated sperm intracellular  
693 pH predicts conventional in vitro fertilization success in normospermic patients. *Fertil Steril* **115**,  
694 930-939, doi:10.1016/j.fertnstert.2020.10.038 (2021).
- 695 43 Hansen, J. N., Rassmann, S., Jikeli, J. F. & Wachten, D. A Simple Analysis Software to  
696 Comprehensively Study Flagellar Beating and Sperm Steering. *Cells* **8**, doi:10.3390/cells8010010  
697 (2018).
- 698
